# Supplementary material
Source: MDPI journal article supplement (https://www.mdpi.com/2073-4352/12/3/433)
Supplement: s1 [file s1]

# Supplementary Materials

## Growth and Thermal Conductivity Study of $\text{CuCr}_2\text{Se}_4$ - $\text{CuCrSe}_2$

### Hetero-Composite Crystals

Haomin Lu <sup>1,2,†</sup>, Chenghao Yin <sup>2,3,†</sup>, Ruonan Zhan <sup>1,2</sup>, Yanyan Zhang <sup>1,2</sup>, Yangyang Lv <sup>2,3</sup>, Minghui Lu <sup>1,2</sup>, Jian Zhou <sup>1,2</sup>, Shuhua Yao <sup>1,2,\*</sup> and Yanbin Chen <sup>2,3,\*</sup>

- <sup>1</sup> Jiangsu Key Laboratory of Artificial Functional Materials, Department of Materials Science and Engineering, Nanjing University, Nanjing 210093, China; mg1934022@smail.nju.edu.cn (H.L.); mg20220052@smail.nju.edu.cn (C.Y.); mf1934070@smail.nju.edu.cn (R.Z.); mf1834078@smail.nju.edu.cn (Y.-Y.Z.); luminghui@nju.edu.cn (M.L.); zhoujian@nju.edu.cn (J.Z.)
- <sup>2</sup> National Laboratory of Solid State Microstructures, Nanjing University, Nanjing 210093, China; lvyangws0801@nju.edu.cn
- <sup>3</sup> Department of Physics, Nanjing University, Nanjing 210093, China
- \* Correspondence: shyao@nju.edu.cn (S.Y.); ybchen@nju.edu.cn (Y.C.)
- † These authors contributed equally to this work.

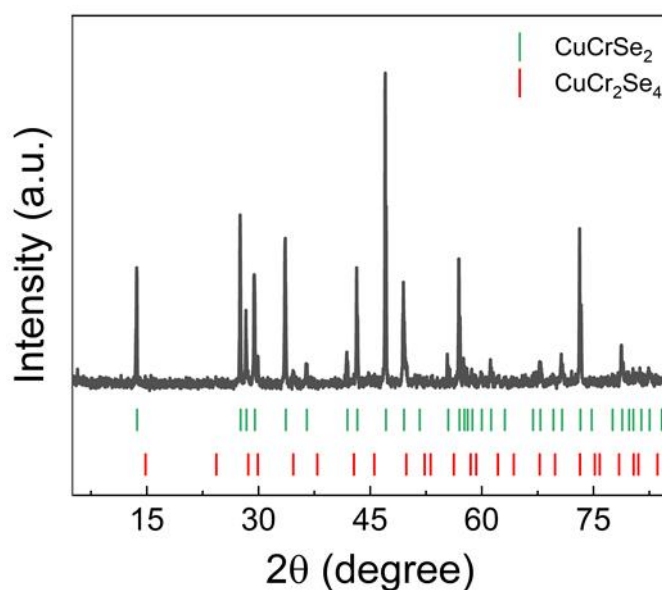

**Figure S1.** XRD pattern of synthesized  $\text{CuCrSe}_2$  polycrystalline powder.

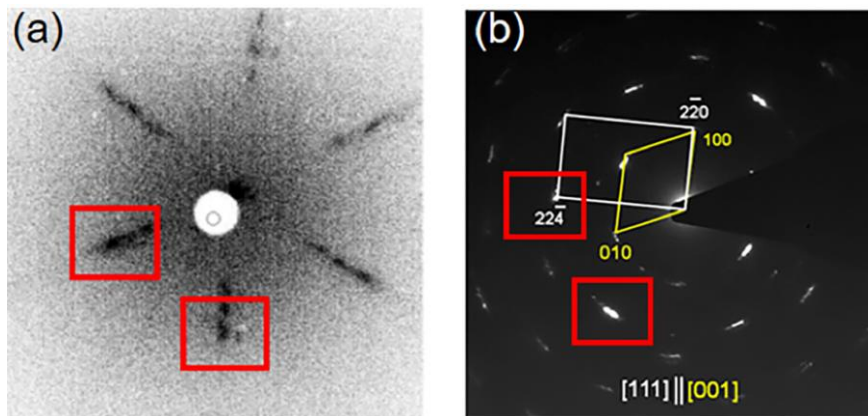

**Figure S2.** (a) The Laue pattern of composite of  $\text{CuCrSe}_2$  and  $\text{CuCr}_2\text{Se}_4$ . The red rectangles highlight the broadening and splitting reflection spots that consist of the reflection spots of  $\text{CuCrSe}_2$  and  $\text{CuCr}_2\text{Se}_4$ , compared with electron diffraction (two red rectangle) shown in (b). Based on this comparison, though the resolution of Laue pattern is poor, the orientation relationship between  $\text{CuCrSe}_2$  and  $\text{CuCr}_2\text{Se}_4$  determined through electron diffraction is correct.
